# Supplementary material
Source: PubMed Central journal article supplement (PMC6399612)
Supplement: EMBR-20-e47468-s001.pdf [file EMBR-20-e47468-s001.pdf]

## Appendix Supplementary information

*Myogenin* promoter-associated lncRNA *Myoparr* is essential for myogenic differentiation

Keisuke Hitachi, Masashi Nakatani, Akihiko Takasaki, Yuya Ouchi, Akiyoshi Uezumi, Hiroshi Ageta, Hidehito Inagaki, Hiroki Kurahashi, and Kunihiro Tsuchida

### Table of contents

|                                                                      |    |
|----------------------------------------------------------------------|----|
| Appendix Figure S1.....                                              | 2  |
| Appendix Figure S2.....                                              | 3  |
| Appendix Figure S3.....                                              | 4  |
| Appendix Figure S4.....                                              | 5  |
| Appendix Figure S5.....                                              | 6  |
| Appendix Table S1. List of locus information of <i>Myoparr</i> ..... | 7  |
| Appendix Table S2. List of siRNA, shRNA, and ASO.....                | 8  |
| Appendix Table S3. List of primers.....                              | 9  |
| Appendix Table S4. List of ChIRP probes.....                         | 10 |

# Appendix Figure S1

A

## Mouse *Myoparr*

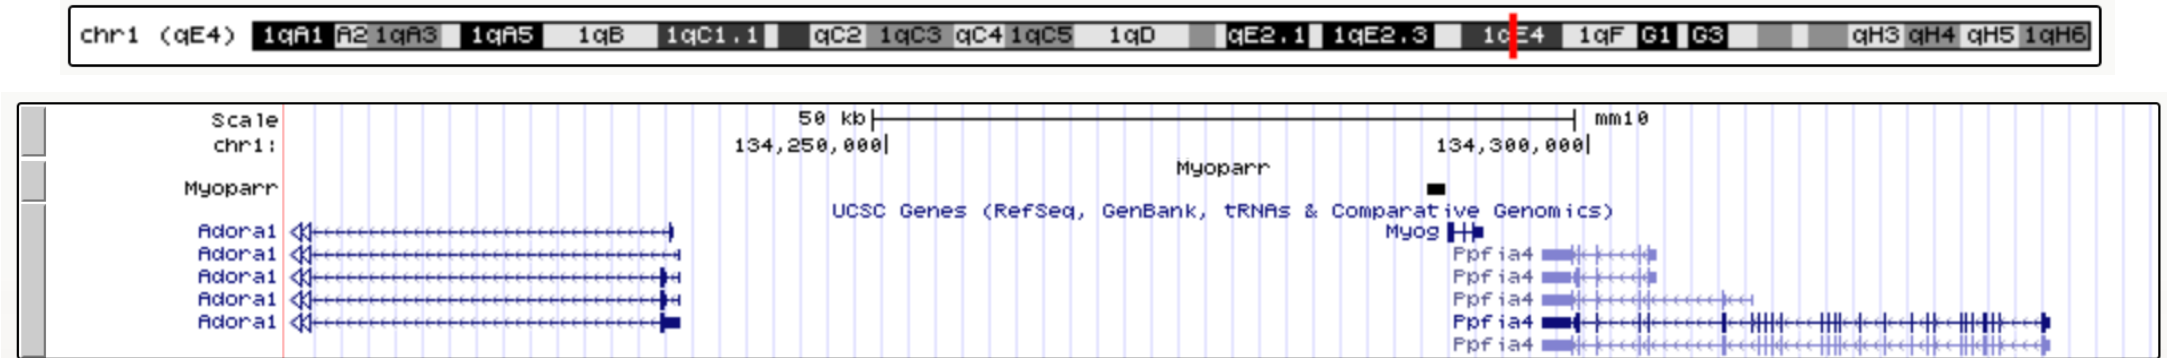

B

## Human *Myoparr*

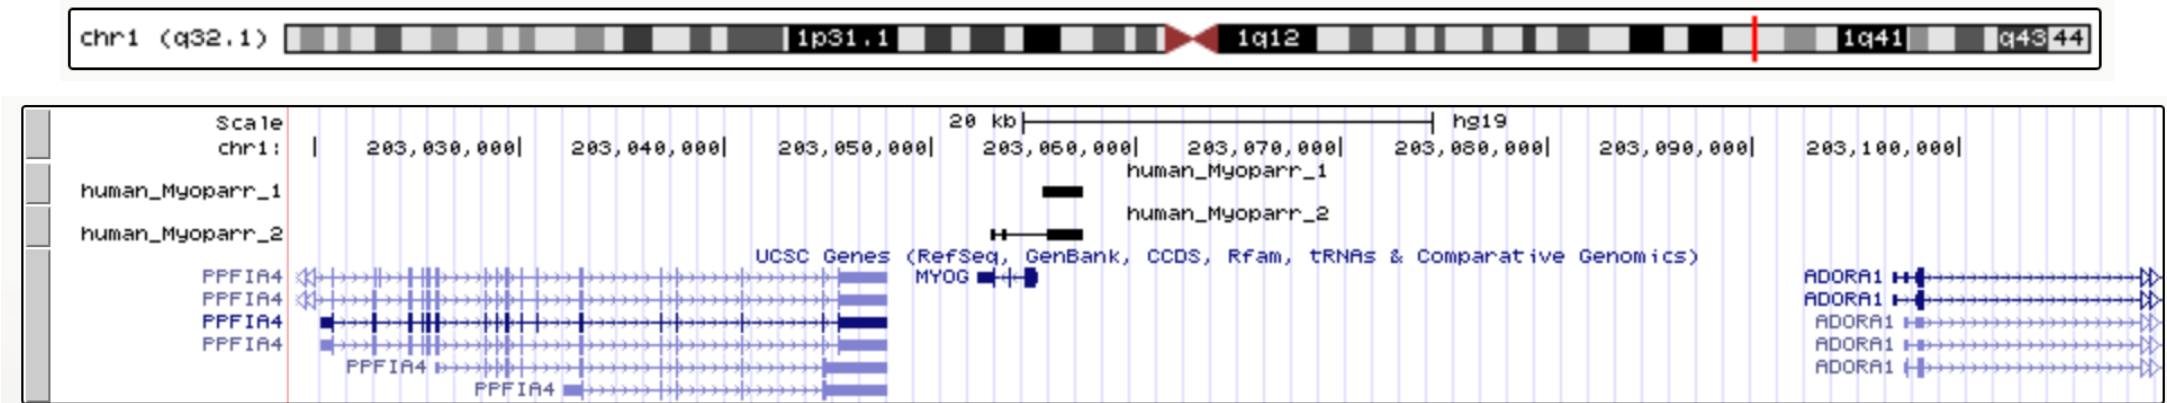

**Appendix Figure S1. Genome Browser screenshot.**

(A-B) UCSC Genome Browser screenshot showing the locations of mouse (A) and human (B) *Myoparr*.

## Appendix Figure S2

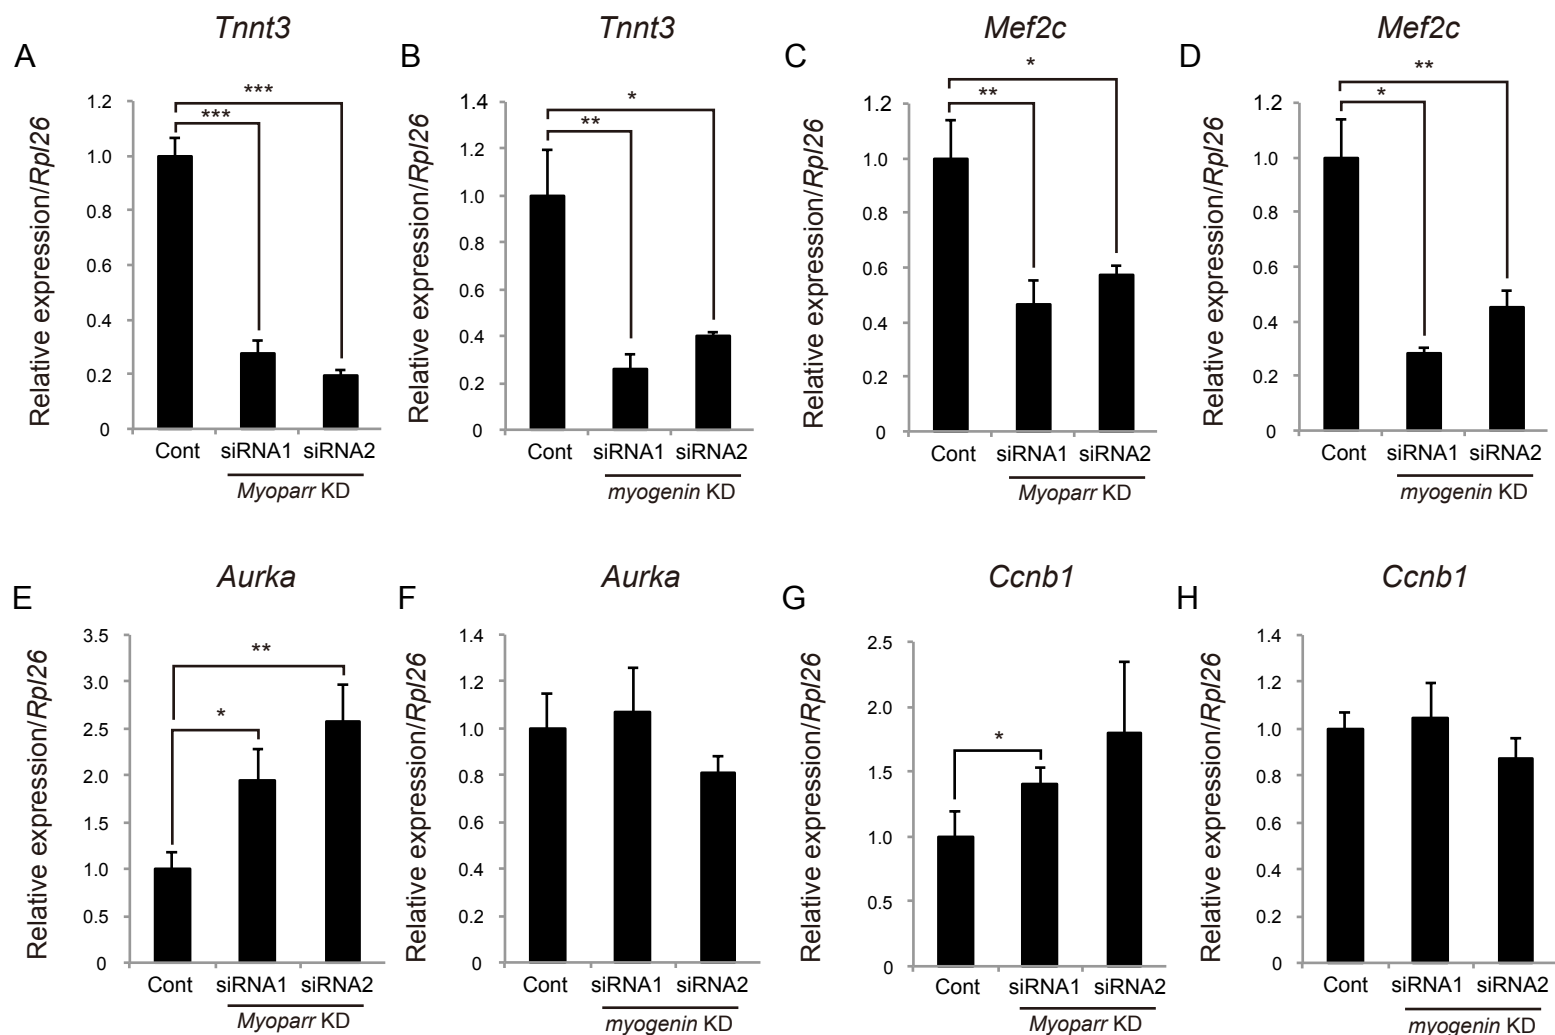

**Appendix Figure S2. Expression changes of genes regulated by *Myoparr* knockdown and *myogenin* knockdown.** (A-H) Quantitative RT-PCR for *Tnnt3* (A-B), *Mef2c* (C-D), *Aurka* (E-F), and *Ccnb1* (G-H) in differentiating C2C12 cells transfected with 50 nM of indicated siRNAs. *Tnnt3* and *Mef2c* are categorized in skeletal muscle contraction and cell differentiation in GO terms. *Aurka* and *Ccnb1* are categorized in cell cycle and cell division in GO terms. n = 3, mean  $\pm$  SD. \* $p < 0.05$ . \*\* $p < 0.01$ . \*\*\* $p < 0.001$ . Statistical analyses were performed using unpaired two-tailed Student's t-test. In cases of unequal variances, unpaired two-tailed Welch's t-test was used.

## Appendix Figure S3

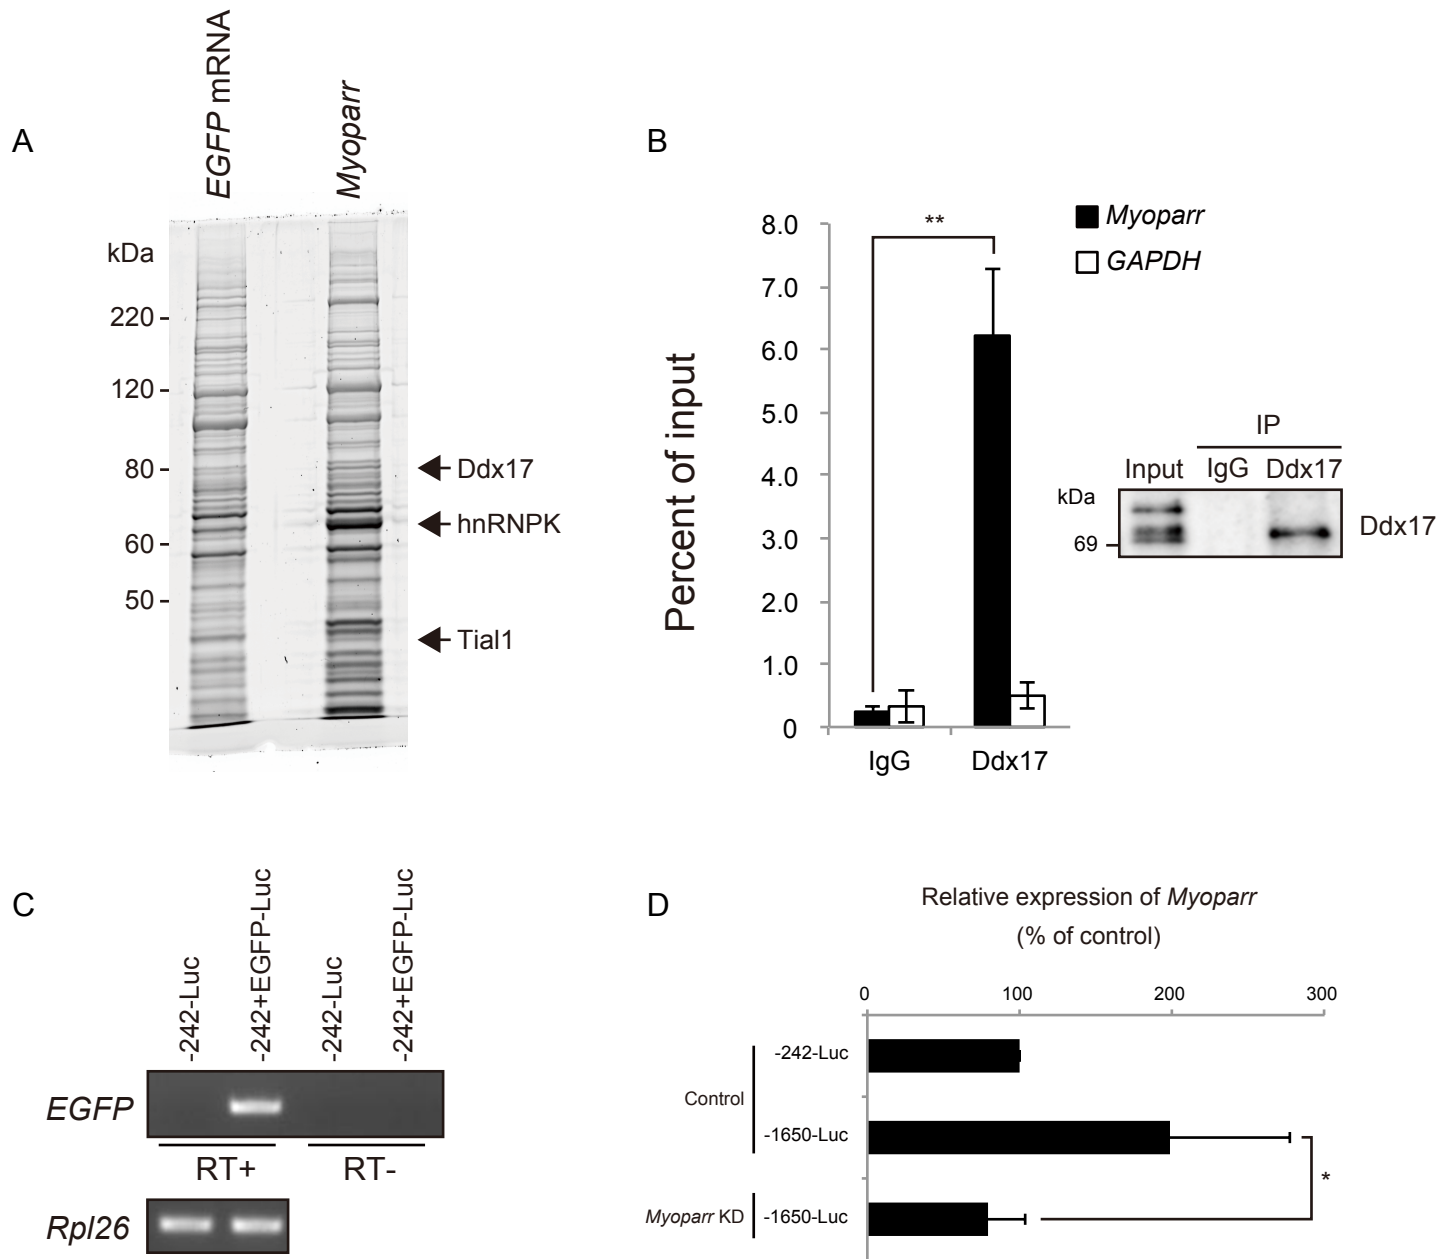

### Appendix Figure S3. Identification of *Myoparr*-interacting proteins.

(A) Nuclear extracts prepared from C2C12 myotubes were immunoprecipitated with BrU labeled *Myoparr* or *EGFP* RNA. Isolated proteins were resolved by SDS-PAGE, and stained with SYPRO Ruby Protein Gel Stain. The protein bands specifically detected in *Myoparr* sample were retrieved and analyzed by mass spectrometry. (B) RNA immunoprecipitation assays showing intracellular interaction between endogenous *Myoparr* and Ddx17. Nuclear lysates of C2C12 myotubes were immunoprecipitated with an anti-Ddx17 antibody or a control rabbit IgG. After washing, the presence of *Myoparr* was detected by qRT-PCR (left). *GAPDH* was used as a negative control. The data were normalized to input values.  $n = 3$ , mean  $\pm$  SD.  $**p < 0.01$  (unpaired two-tailed Welch's t-test). Specific immunoprecipitation (IP) of Ddx17 by an anti-Ddx17 antibody was confirmed by western blot (right). (C) RT-PCR for *EGFP* in C2C12 cells transfected with the -242-Luc or -242-EGFP-Luc construct. The presence or absence of reverse transcriptase (RT) is indicated by (+) or (-), respectively. Expression of *Rpl26* served as an internal control. (D) Relative expression of *Myoparr* in Figure 4H was quantified by qRT-PCR. The results were normalized to *Rpl26* expression. Data are shown as percent of the control (-242-Luc) and are the mean  $\pm$  SD.  $n = 3$ ,  $*p < 0.05$  (unpaired two-tailed Welch's t-test).

## Appendix Figure S4

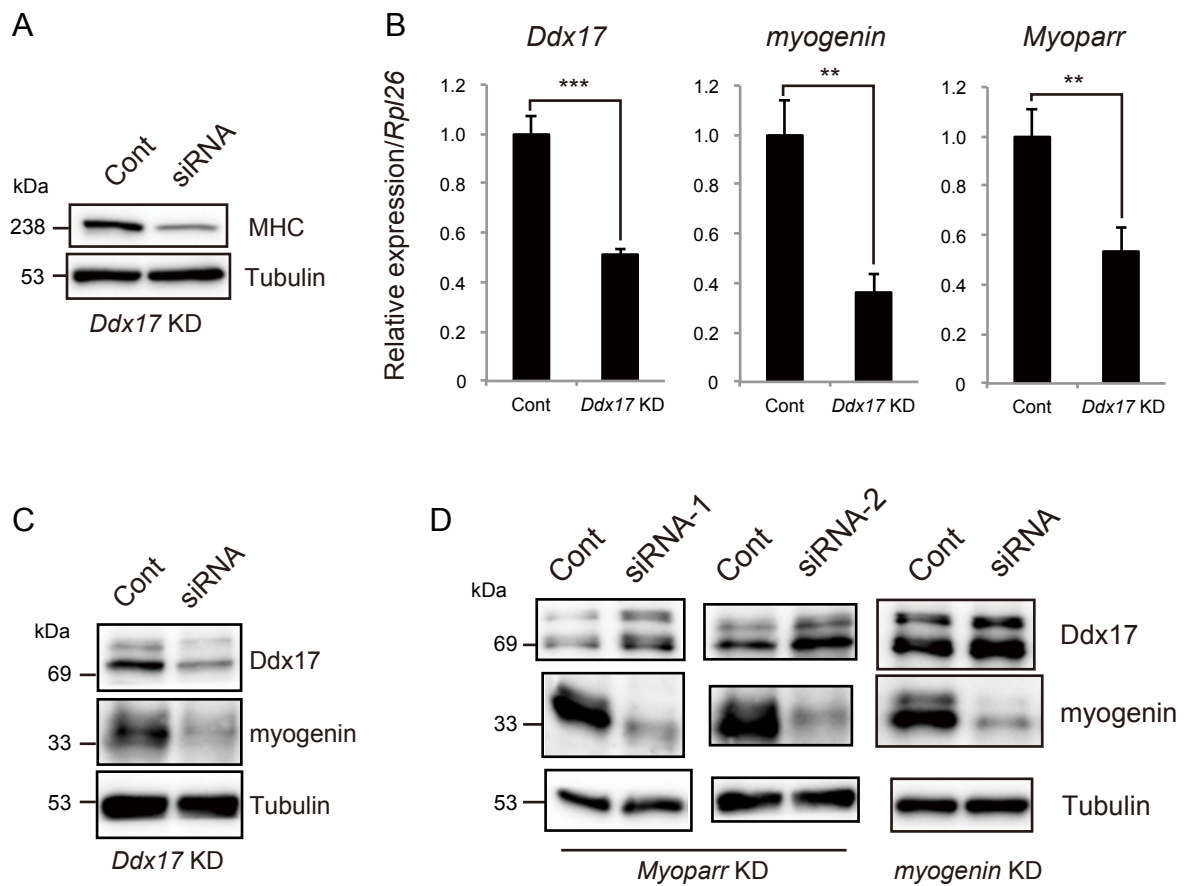

### Appendix Figure S4. Expression changes of genes and proteins in *Ddx17*-deficient C2C12 cells.

(A) Western blot for MHC in *Ddx17*-depleted differentiating C2C12 cells. Tubulin expression served as an internal control. (B) Relative expression of *Ddx17*, *myogenin*, and *Myoparr* quantified by qRT-PCR in *Ddx17*-depleted C2C12 cells.  $n = 3$ , mean  $\pm$  SD.  $**p < 0.01$ .  $***p < 0.001$  (unpaired two-tailed Student's t-test). (C) Decreased expression of myogenin protein by *Ddx17* knockdown shown by western blot. (D) Western blots for *Ddx17* and myogenin protein in C2C12 cells transfected with *Myoparr* or *myogenin* siRNAs.

## Appendix Figure S5

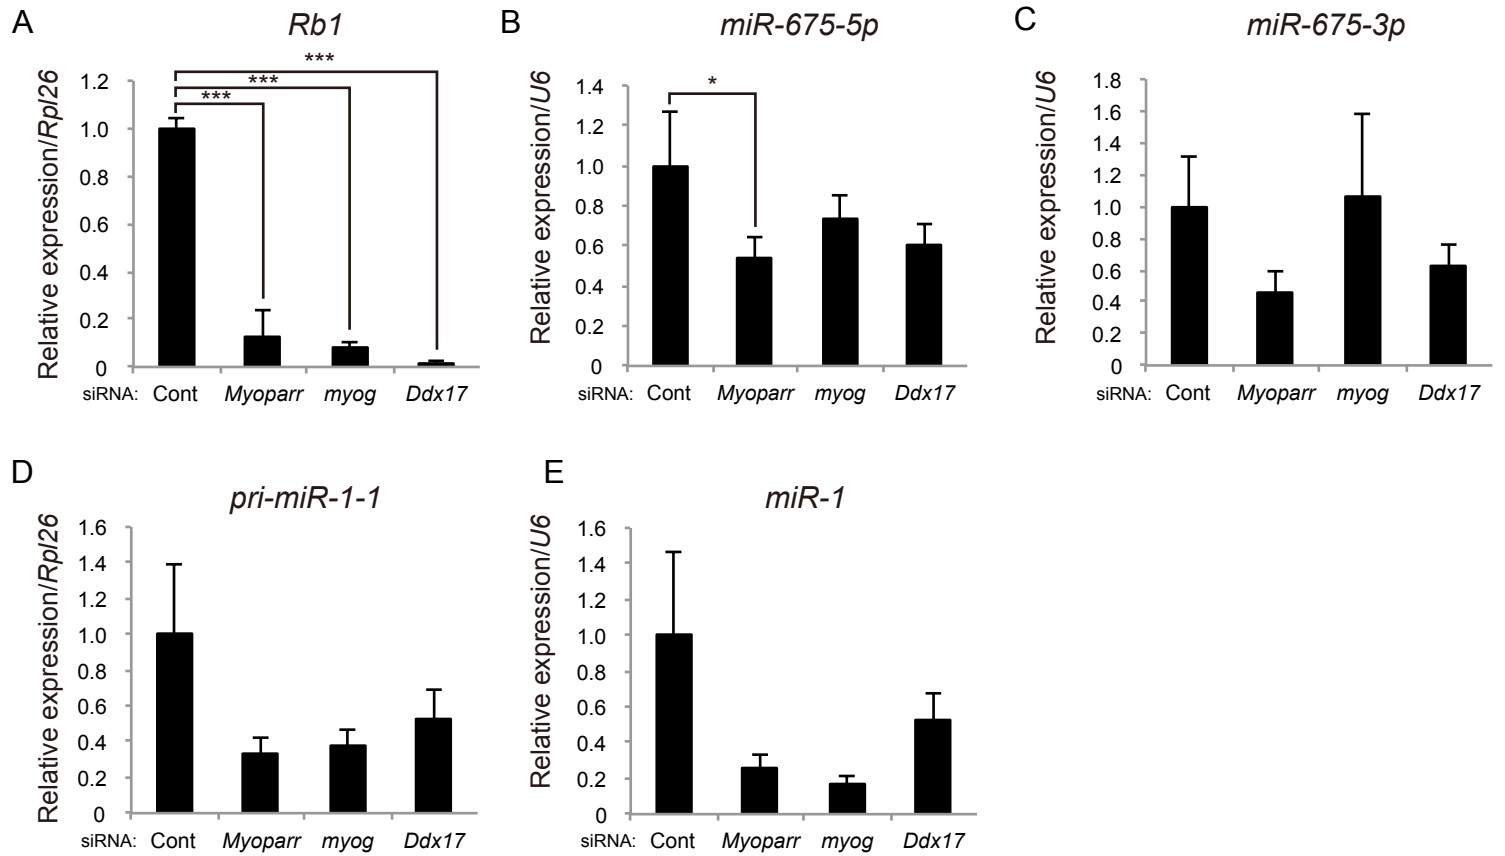

**Appendix Figure S5. Expression changes of genes regulated by *Myoparr*, *Ddx17*, and *myogenin* knockdown.** (A-E) Quantitative RT-PCR for *Rb1* (A), *miR-675-5p* (B), *miR-675-3p* (C), *pri-miR-1-1* (D), and *miR-1* (E) in differentiating C2C12 cells transfected with 50 nM of indicated siRNAs. n = 3, mean  $\pm$  SD. \* $p$  < 0.05. \*\*\* $p$  < 0.001 (unpaired two-tailed Student's t-test).

**Appendix Table S1.** List of locus information of *Myoparr*.

|                                                                 |                           |
|-----------------------------------------------------------------|---------------------------|
| Locus information (mouse) mm10                                  |                           |
| <i>Myoparr</i> (from skeletal muscle of C57BL/6J)               | chr1: 134288595-134289760 |
| <i>myogenin</i> -associated sense long non-coding RNA isoform-1 | chr1: 134287131-134292548 |
| <i>myogenin</i> -associated sense long non-coding RNA isoform-2 | chr1: 134287131-134292548 |
| <i>myogenin</i> -associated sense long non-coding RNA isoform-3 | chr1: 134287131-134287485 |
| <i>myogenin</i> -associated sense long non-coding RNA isoform-4 | chr1: 134287131-134287873 |
| <i>myogenin</i> -associated sense long non-coding RNA isoform-5 | chr1: 134287575-134292550 |
| <i>myogenin</i> -associated sense long non-coding RNA isoform-6 | chr1: 134287575-134292550 |
| <i>myogenin</i> -associated sense long non-coding RNA isoform-7 | chr1: 134287575-134292550 |
|                                                                 |                           |
| Locus information (human) hg19                                  |                           |
| <i>Myoparr</i> isoform-1 (from human myoblasts)                 | chr1: 203055492-203057468 |
| <i>Myoparr</i> isoform-2 (from human myoblasts)                 | chr1: 203052923-203057468 |

**Appendix Table S2. List of siRNA, shRNA, and ASO.**

| siRNA            |                                                                                  |                                      |
|------------------|----------------------------------------------------------------------------------|--------------------------------------|
| Target name      | Target Sequence                                                                  |                                      |
| Control 1        | Stealth RNAi siRNA negative control, Med GC (Thermo Fisher Scientific)           |                                      |
| Control 2        | Stealth RNAi siRNA negative control, Med GC Duplex #3 (Thermo Fisher Scientific) |                                      |
| Myoparr siRNA 1  | CCCTAAAGACCTACCACTACCACAT                                                        |                                      |
| Myoparr siRNA 2  | GATGGACCCTGTCTGATGCTCTTAA                                                        |                                      |
| myogenin siRNA 1 | GGGAGAAGCGCAGGCTCAAGAAAGT                                                        | MSS275910 (Thermo Fisher Scientific) |
| myogenin siRNA 2 | CAGACGCCACCAATCTGCACTCCCT                                                        | MSS275912 (Thermo Fisher Scientific) |
| Ddx17 siRNA      | CACCAACAAGGGCACTGCCTATACT                                                        |                                      |
|                  |                                                                                  |                                      |
| ASO              |                                                                                  |                                      |
| Target name      | Target Sequence                                                                  |                                      |
| Control          | Antisense LNA GapmeR, negative control A, in vitro standard (Takara)             |                                      |
| Myoparr ASO1     | CCATACTATGTCAGTC                                                                 |                                      |
| Myoparr ASO2     | TCTCTTCTGTGCTTTC                                                                 |                                      |
|                  |                                                                                  |                                      |
| shRNA            |                                                                                  |                                      |
| Target name      | Target Sequence                                                                  |                                      |
| Myoparr shRNA 1  | TCTCATCTGCTCCTTTCAATT                                                            |                                      |
| Myoparr shRNA 2  | GACCCTGTCTGATGCTCTTAA                                                            |                                      |
| Myoparr shRNA 3  | TACCACATCAGGACCACTCCA                                                            |                                      |



**Appendix Table S3. List of primers.**

| Primers for PCR analysis in mouse  |                                            |                              |
|------------------------------------|--------------------------------------------|------------------------------|
| Target name                        | Forward                                    | Reverse                      |
| A, -493/-302                       | GACATAGTATGGTTTAAAGGTGCTGC                 | CGTCTCATCTGCTCCTTTCAATTAC    |
| B, -711/-469                       | CTCTTACTTCAATCTACCCCAACA                   | GCAGCACCTTAAACCATACTATGTC    |
| C, -927/-702                       | GGGAACCTTTGGGATAGCAITTGAA                  | GAAGTAAGAGAACACAGGGACTTCT    |
| D, -1444/-1268                     | CCCTTCTACAGAAAGGAAAGAGTCA                  | AGCTATATCAGGGTCTTTTCAGCAA    |
| Target name                        | Sequence                                   |                              |
| a                                  | CGTCTCATCTGCTCCTTTCAATTAC                  |                              |
| b                                  | GCAGCACCTTAAACCATACTATGTC                  |                              |
| c                                  | CTCTTACTTCAATCTACCCCAACA                   |                              |
| d                                  | GGGAACCTTTGGGATAGCAITTGAA                  |                              |
|                                    |                                            |                              |
| Primers for PCR analysis in human  |                                            |                              |
| Target name                        | Forward                                    | Reverse                      |
| A, -538/-370                       | TGCCCATGAATGCCAGAAT                        | GGGAACAAGGAAGGGTAGGC         |
| B, -825/-681                       | GGGAGGAGACAGGGAGCTTA                       | TTGGTTTCTTGGCAGGGGT          |
| Target name                        | Sequence                                   |                              |
| a                                  | GGGAACAAGGAAGGGTAGGC                       |                              |
| b                                  | ATTCTGGGCATTCATGGCA                        |                              |
| c                                  | ACCCCTGCCAAGAAAACCAA                       |                              |
| d                                  | GGGAGGAGACAGGGAGCTTA                       |                              |
|                                    |                                            |                              |
| Primers for real-time PCR analysis |                                            |                              |
| Target name                        | Forward                                    | Reverse                      |
| GAPDH                              | CCTGGAGAAACCTGCCAAGTATG                    | AGAGTGGGAGTTGCTGTTGAAGTC     |
| myogenin                           | CAGTACATTGAGCGCTACAG                       | GGACCGAACTCCAGTGCAT          |
| Neat1                              | TTGGGACAGTGGACGTGTGG                       | TCAAGTGCCAGCAGACAGCA         |
| Myoparr (1)                        | GTGCCCTATCGTCCATGGAG                       | CACTGACTTCACCTGACCCC         |
| Myoparr (2)                        | GGCAGGAAGGGAACAAGAA                        | CCCCAAATCTGGAGTGGTCC         |
| Sense RNA                          | CCACCCTGAGATCCACACAC                       | GGGACGAGGATCACTTGCAA         |
| SRA1                               | TCCACCTCCTCAAGTAAGGCT                      | GACCTCAGTCACATGGTCAACC       |
| Malat1                             | CATGGCGGAATTGCTGGTA                        | CGTGCCAACAGCATAAGCAGTA       |
| Myod1                              | CCACTCCGGGACATAGACTTG                      | AAAAGCGCAGGTCTGGTGAG         |
| Myf5                               | CCTGTCTGGTCCCGAAAGAAC                      | GACGTGATCCGATCCACAATG        |
| MRF4                               | ATCAGCTACATTGAGCGTCTACA                    | CCTGGAATGATCCGAAACACTTG      |
| EGFP                               | GAACGGCATCAAGGTGAACT                       | GAACTCCAGCAGGACCATGT         |
| Ddx17                              | GATCGGGATCGTGACAGGGA                       | AGTCAGTCTTGCTACTTCTGGAT      |
| Rpl26                              | GGTCTATGCCATTCCGAAGG                       | TCGTTCGATGTAGATGACGTACT      |
| pri-miR-133b                       | CTGGTCAAACGGAACCAAGT                       | TGATGGCAAACCAGCATTA          |
| pri-miR-206                        | TTCTTCTGCGTGACAAGTG                        | GCCAAAACCCACACTTCTCT         |
| H19                                | CTGCTCCAAGGTGAAGCTGA                       | TAGAGGCTTGGCTCCAGGAT         |
| Pola1                              | AGCTCGGCGAGAAAAGAAATC                      | CCACATAGCTATCCCATCGTC        |
| Rb1                                | TGCACTTTATCGCAGCAGTT                       | GTTCACACGTCCGTTCTAAATTG      |
| pri-miR-1-1                        | CCTACCTGCTTGGGACACAT                       | CAGTCTGGCGAGAGAGTTCC         |
| Aurka                              | CTGGATGCTGCAAACGGATAG                      | CGAAGGGAACAGTGGTCTTAACA      |
| Tnnt3                              | GGAACGCCAGAACAGATTGG                       | TGGAGGACAGAGCCTTTTCTT        |
| Mef2c                              | TGCTGGTCTCACCTGGTAAC                       | ATCCTTTGATTCACTGATGGCAT      |
| Ccnb1                              | AAGGTGCCTGTGTGTGAACC                       | GTCAGCCCCATCATCTGCG          |
| human Myoparr                      | ACCCCTGCCAAGAAAACCAA                       | ATTCTGGGCATTCATGGCA          |
| human myogenin                     | GGGGAACCTACCTGCCTGTC                       | AGGCGCTCGATGTACTGGAT         |
| human GAPDH                        | ACCCACTCTCCACCTTGA                         | TTGCTGTAGCCAAATTCGTTG        |
|                                    |                                            |                              |
| Target name                        | Sequence                                   |                              |
| miR-133b                           | miScript Primer Assay (QIAGEN, MS00007301) |                              |
| miR-206                            | TGGAATGTAAGGAAGTGTGG                       |                              |
| miR-675-5p                         | GCGGAAAGGGCCACAGT                          |                              |
| miR-675-3p                         | CTGTATGCCCTAACCGCTCAGT                     |                              |
| miR-1                              | miScript Primer Assay (QIAGEN, MS00011004) |                              |
| U6                                 | miScript Primer Assay (QIAGEN, MS00014000) |                              |
|                                    |                                            |                              |
| qPCR primer for ChIP and ChIRP     |                                            |                              |
| Target name                        | Forward                                    | Reverse                      |
| myogenin promoter                  | GAATCACATGTAATCCACTGGAAA                   | ACCCAGAGATAAATATAGCCAACG     |
| myogenin ORF                       | GAGGAAGTCTGTGTCGGTGG                       | ATCTCCACTTTAGGCAGCCG         |
| Myod1 promoter                     | AACAGATATTCTCTGAGCCATTCC                   | GAGAAGAGTGGAGAAATGATGACA     |
| miR-133b promoter                  | ACGAAGCGATGAGGATCCAC                       | TGTCCTTGTCTAAATCCCCCT        |
| miR-206 promoter                   | CCAGGCGTATTGTACTTCC                        | TGCCAGTGTCCATTCATCTC         |
| H19 promoter                       | ACCACCGTTCTATGAAGGGC                       | TCCAAAGACAGCCTCACCAC         |
| GAPDH promoter                     | AGTCCGTATTATAGGAACCCGGATGGTGG              | ATGAGAGAGGCCAGCTACTCGCGCTTTA |
| myogenin 3'UTR                     | GAGACATGAGTGCCTGACC                        | CAGAGGCTTTGGAACCGGAT         |

**Appendix Table S4.** List of ChIRP probes.

|                   |                      |
|-------------------|----------------------|
| Biotin-TEG probes |                      |
| Odd1              | ACAGGGGCTGTGGAGAAATG |
| Even1             | GACCATGGAGGAGAGAGTAG |
| Odd2              | AAGTGGATTTTCAAGACCCC |
| Even2             | TGGTAGTGGTAGGTCTTTAG |
| Odd3              | ACGATAGGGCACACACACAC |
| Even3             | ACATCATGAGACCTGGTCAA |
| Odd4              | AACACTGACTTCACCTGACC |
| Even4             | GTCAGACAGGGGACTGAACA |
| Odd5              | GGGGGTATAGGGAAC TTTG |
| Even5             | CCCTGGTATTGCAA ACTAT |
| Odd6              | ACCCTATAGGTGGAACAACA |
| Even6             | AGAAGTGGATGCTCACAGTC |
| Odd7              | CACTATTACATATGCCAGCA |
| Even7             | CCAGAAGGCATTATTGAGGG |
