# Supplementary material
Source: PubMed Central journal article supplement (PMC6399612)
Supplement: EMBR-20-e47468-s002.pdf [file EMBR-20-e47468-s002.pdf]

## Expanded View Figures

### Figure EV1. Characterization of mouse and human *Myoparr*.

- A Schematic diagram of the results of 5'- and 3'-RACE analysis of sense and anti-sense transcripts. The 3'-ends of several sense transcripts overlap with *myogenin* mRNA.
- B Coding potential assessment of the indicated RNAs using a coding potential assessment tool (CPAT). Low coding probabilities for anti-sense transcript and sense transcript 1 (Long) and 4 (Short) as well as *lincRNA-p21* are shown.
- C *In vitro* transcription/translation of pCS2-Anti-Sense, pCS2-Sense (Long), and pCS2-Sense (Short). The pCS2+ vector was used as a negative control. pCS2-EGFP and pCS2-myogenin were used as positive controls.
- D The sequence of *Myoparr* cloned from mouse C2C12 cells. The potential RNA nuclear retention signal and putative polyadenylation signal are enclosed in a black and red box, respectively. The LINE-1-like sequence is underlined.
- E Schematic representation of the upstream region of human *myogenin* and regions amplified by RT-PCR (top). RT-PCR for novel transcripts in human primary myotubes (bottom). The presence or absence of reverse transcriptase (RT) is indicated by (+) or (-), respectively.
- F The primers used for RT-PCR (top). Strand-specific RT-PCR for the novel transcripts in the upstream region of human *myogenin* (bottom).
- G Schematic diagram of the results of 5'- and 3'-RACE analysis of human *Myoparr*.

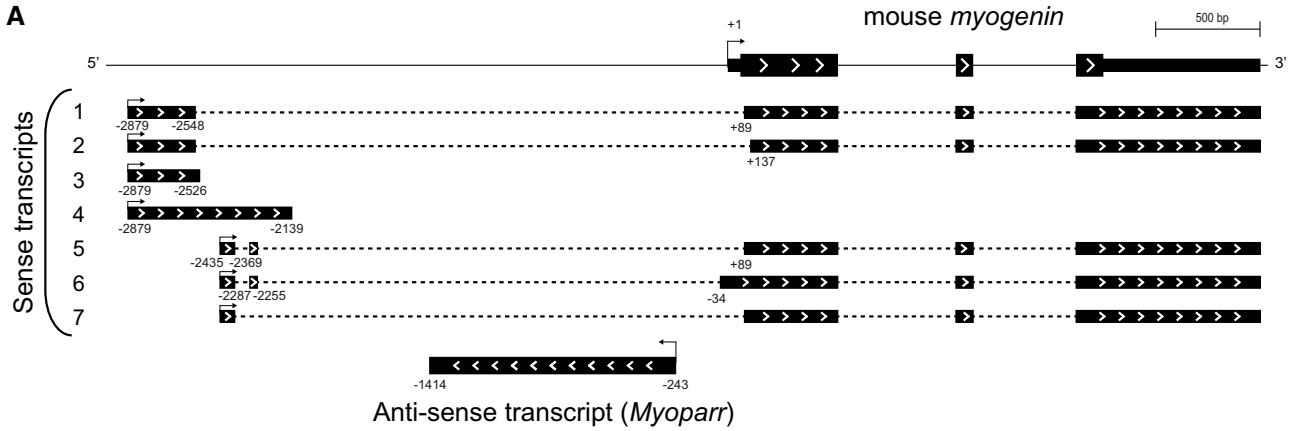

**B** Coding potential assessment by coding potential assessment tool (CPAT)

| Sequence Name            | RNA size | ORF size | Fickett Score | Hexamer Score | Coding Probability | Coding Label |
|--------------------------|----------|----------|---------------|---------------|--------------------|--------------|
| <i>GAPDH</i>             | 1228     | 1002     | 1.2926        | 0.541682098   | 0.998401596        | yes          |
| <i>myogenin</i>          | 1518     | 675      | 1.1183        | 0.441597496   | 0.965381051        | yes          |
| <i>lincRNA-p21</i>       | 3073     | 309      | 0.9806        | 0.041254541   | 0.246453936        | no           |
| Anti-sense transcript    | 1172     | 192      | 0.7409        | -0.117943156  | 0.047611813        | no           |
| Sense transcript (Long)  | 1762     | 219      | 1.0959        | -0.136002048  | 0.102029323        | no           |
| Sense transcript (Short) | 765      | 135      | 0.9152        | 0.07890528    | 0.087841224        | no           |

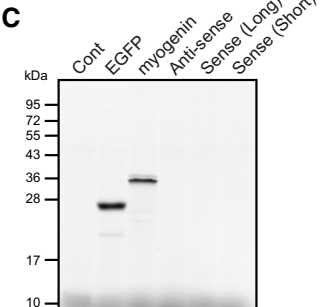

**D** mouse *Myoparr* (1172 nt)

```

1 AGUUUUCAU UCUCACAGC CCUGUGGGG CAGGGAAGGU GGGGUGGGU GCAUUCCCC
61 GUCUCAUCUG CUCCUUUCA UUAUCUCCUAC CCGGGCCUCC UGCCUACUCU CUCCUCCAUG
121 GUCCAAGGCA GCUGGUGGAC AGGGCAGGAA GGAACAAGA AAGGGGUUGU CUUGGACGGA
181 CGGGAAGGGG UCUUGAAA AU CCACUUAGCC UUCUCUUUCC UGCUCAGCAG CACCUUAAC
241 CAUACUAUGU CAGUCCCAUG AGACCCCUAA AGACCUACCA CUACCACAUC AGGACCACUC
301 CAGAUUUGGG GCGUGUGUGU GUGUGUGUGU GUGUGUGUGU GUGUGUGUGU GUGUGUGUCC
361 UAUCGUCCAU GGAGGCAAAG ACAGAAACCC AGAAGGGCAA AUGGAUUCAA CUUUUGGGUU
421 UCUCACAGCU CUUUGACCAG GUCUCAUGAU GUUGGGGGUA GAUUGAAGUA AGAGAACACA
481 GGGACUUCU AAGUAAGGGG GGGGGCCUUA AGUAGUAGG GUCAGGUGAA GUCAGUGUUU
541 AGCAAGGAU AGAACUCACA GACUACUCUA CAUUGCCUUC UUCUCCCUA GUCAAGAGCU
601 GUUCAGUCC CUGUCUGAGC CUCUUUUUA AAUUUUUUU UAUUAGAUAU UUUCUUCAUU
661 UACAUUUCAA AUGCUAUCC AAAAGUCC UAUACCCCG CUCCCCCGC CCUGUCUCC
721 UACCCACUCA UUCACAUUC UUGGCCUUG CGUUCUCCUG UACUGGGCA UAUAGUUUGC
781 AAUACCAAGG GGCCUCUCU CCACAUAGU GCCGACUAG CCAUCUUCUG CUACAUAGC
841 AGCUAGAGAC AUGAGCUCUG GGGGUACUG UUAGUUAUA UUGUUGUCC ACCUAUAGG
901 UUGCAGACC CUUCAGUUC UUGGUACU UCUCUAGCUC CUCCAUUGGG GGCCUGUGU
961 UCCAUCCAAU AGCUGACUGU GAGCAUCCAC UUCUGUAUU GCCAGGCACU GGCAUAGCCU
1021 CACAAGAGGC AGCUAUAUA GGUUCUUUC AGCAAAUUC UGCUGGCAUA UGUAAUAGU
1081 UCUGUGUUUG GUGGCUGAU AUGGGAUGG CCCUGUCUGA UGCUCUUAU CAUCUCUUCU
1141 GUGCUUCC CUCAAUAUG CCUUCUGGCA CU
    
```

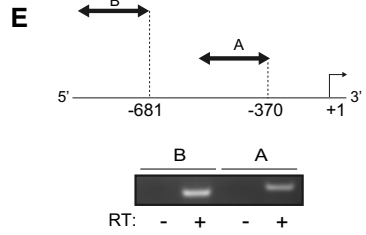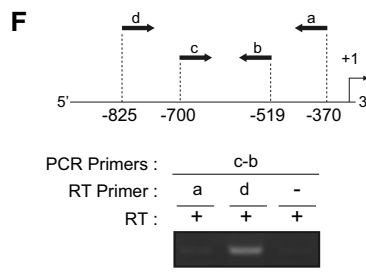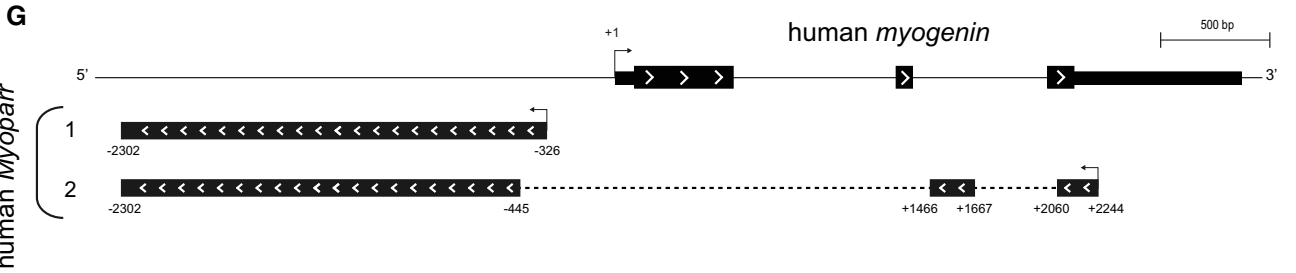

Figure EV1.

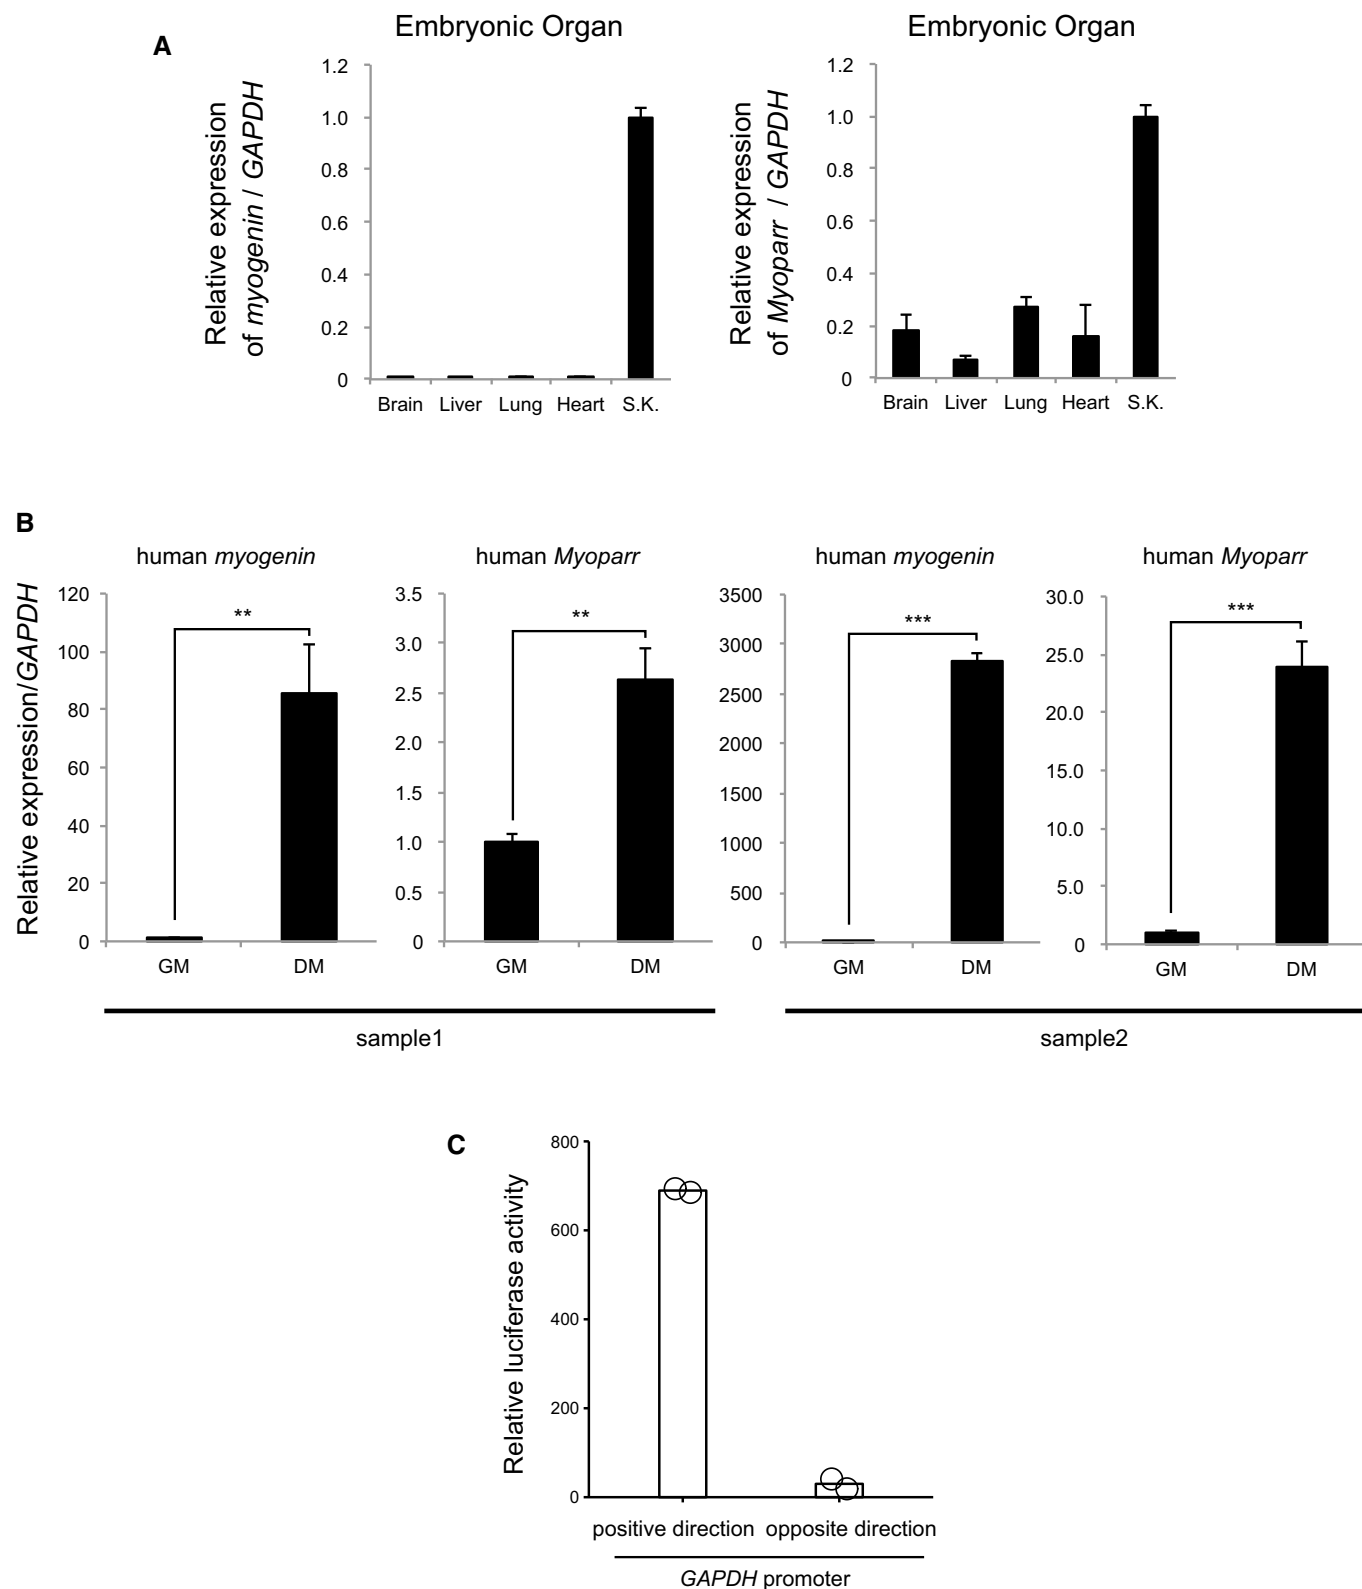

Figure EV2.

**Figure EV2. Expression of mouse and human *Myoparr*.**

- A Quantitative RT–PCR for mouse *myogenin* and *Myoparr* in embryonic organs.  $n = 3$ , mean  $\pm$  SD. S.K., skeletal muscle.
- B The expression levels of human *myogenin* and *Myoparr* in human primary myoblasts (growth medium, GM) and myotubes (differentiation medium, DM) evaluated by qRT–PCR.  $n = 4$ , mean  $\pm$  SD. \*\* $P < 0.01$ . \*\*\* $P < 0.001$  (unpaired two-tailed Welch's  $t$ -test). Preparations from two independent specimens are shown.
- C Relative Luciferase activities of the *GAPDH* promoters (positive and opposite directions) in C2C12 cells. Bars indicate the average of two independent experiments, and open circles represent the values of each experiment.

**Figure EV3. Regulation of *myogenin* expression by *Myoparr*.**

- A Quantitative RT–PCR for *Myoparr* expression in differentiating C2C12 cells transfected with control or *Myoparr* anti-sense oligonucleotides (ASOs). Cells were transfected with 50 nM ASOs, and the levels of *Myoparr* expression were quantified by qRT–PCR 48 h after knockdowns.  $n = 3$ , mean  $\pm$  SD. \* $P < 0.05$  (unpaired two-tailed Student's  $t$ -test).
- B qRT–PCR showing decreased *myogenin* expression in differentiating C2C12 cells transfected with control or *Myoparr* ASOs.  $n = 4$ , mean  $\pm$  SD. \* $P < 0.05$  (unpaired two-tailed Student's  $t$ -test).
- C Decreased *myogenin* protein expression in differentiating C2C12 cells 48 h after *Myoparr* knockdown using ASOs. Expression of tubulin served as an internal control.
- D ChIP–qPCR detection of Pol II occupancy and histone modification status at the *GAPDH* promoter in *Myoparr*-depleted differentiating C2C12 cells. The data were normalized to input values.  $n = 3$ , mean  $\pm$  SD. n.s., not significant. Statistical analyses were performed using an unpaired two-tailed Student's  $t$ -test (Pol II and H3K4me3). In cases of unequal variances (H3K27ac), an unpaired two-tailed Welch's  $t$ -test was used.
- E A schematic diagram of the CpG sites at the *myogenin* upstream region. Red lines indicate individual CpG sites. The methylation status at the –474/–18 region in *Myoparr*-depleted C2C12 cells was examined.
- F The methylation status at the –474/–18 region is shown. C2C12 cells were transfected with 50 nM siRNAs. The methylation status was evaluated 1 and 3 days after differentiation induction. The day 0 sample is from non-transfected cells. The CpG sites are indicated by circles (black and white circles indicate methylated and unmethylated cytosine sites, respectively), and each row represents an individual clone.
- G The methylation status of (F) is shown as a methylated/unmethylated ratio.
- H, I Decreased MHC expression by *Myoparr* knockdowns using siRNAs (H) or ASOs (I) in C2C12 myotubes. Expression of tubulin served as an internal control.
- J–L The expression changes of *MyoD1* (J), *Myf5* (K), and *MRF4* (L) quantified by qRT–PCR either in *Myoparr*- or *myogenin*-depleted differentiating C2C12 cells.  $n = 3$ , mean  $\pm$  SD. \* $P < 0.05$ , \*\* $P < 0.01$  (unpaired two-tailed Student's  $t$ -test).
- M Decreased Pol II occupancy at the *MyoD1* promoter detected by ChIP–qPCR in *Myoparr*-depleted differentiating C2C12 cells. The data were normalized to input values.  $n = 3$ , mean  $\pm$  SD. \* $P < 0.05$  (unpaired two-tailed Student's  $t$ -test).

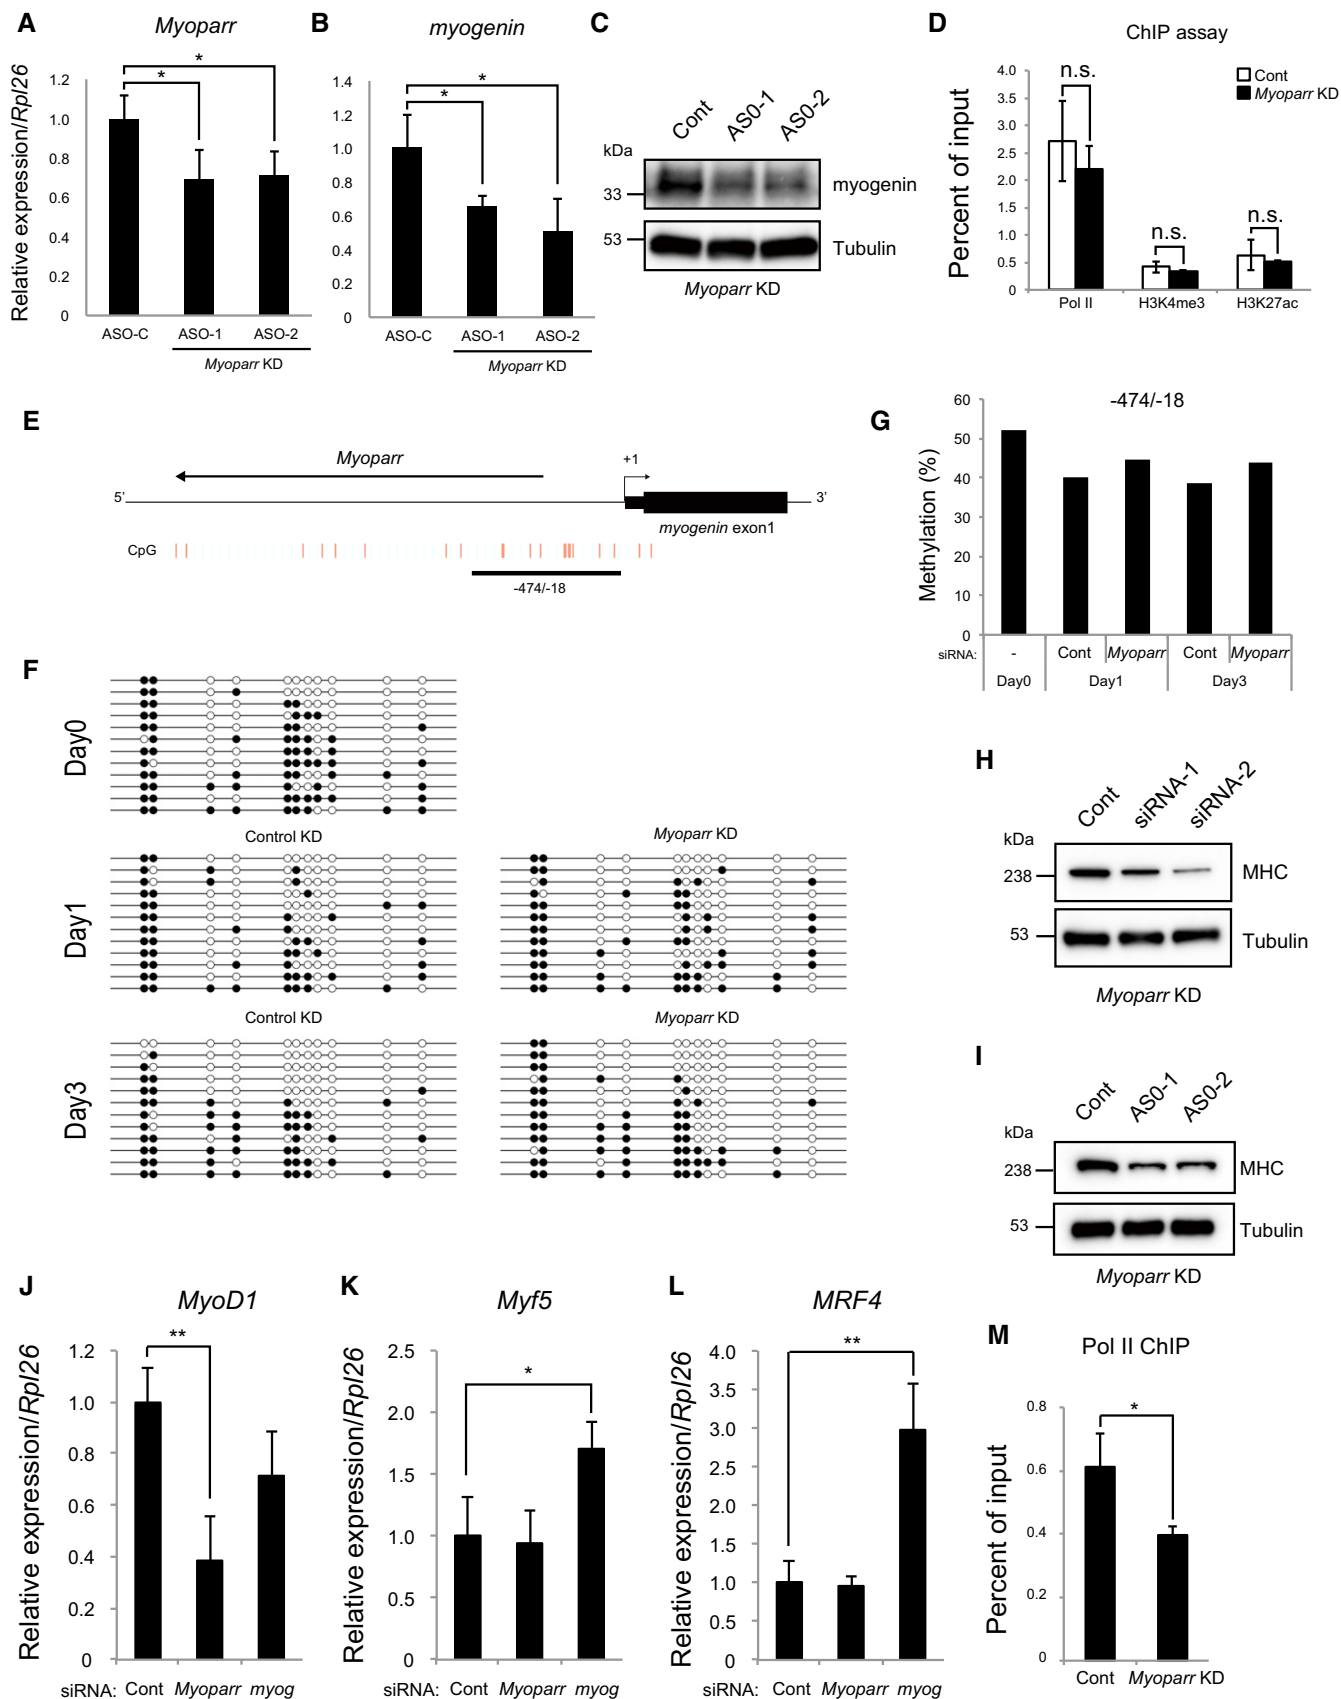

Figure EV3.

**Figure EV4. *Myoparr* depletion prevents skeletal muscle atrophy.**

- A Three days after denervation, weights of innervated (–) and denervated (+) tibialis anterior (TA) muscles were measured.  $n = 4$ , mean  $\pm$  SEM.  $**P < 0.01$  (unpaired two-tailed Student's *t*-test).
- B Expression of *myogenin* in innervated and denervated TA muscles detected by qRT-PCR 3 days after denervation.  $n = 4$ , mean  $\pm$  SD.  $***P < 0.001$  (unpaired two-tailed Welch's *t*-test).
- C Quantitative RT-PCR showing increased *Myoparr* expression in denervated TA muscles 3 days after denervation.  $n = 4$ , mean  $\pm$  SD.  $***P < 0.001$  (unpaired two-tailed Student's *t*-test).
- D Evaluation of the inhibitory effect of *Myoparr* expression by *Myoparr* shRNAs in NIH3T3 cells.  $n = 3$ , mean  $\pm$  SD.  $**P < 0.01$ .  $***P < 0.001$  (unpaired two-tailed Welch's *t*-test). The results were normalized to *Rpl26* expression. Data are shown as percent of the control.
- E *In vivo* inhibitory effect of *Myoparr* shRNA against the expression of *Myoparr* and *myogenin* in innervated TA muscles.  $n = 4$ , mean  $\pm$  SD.  $*P < 0.05$  (unpaired two-tailed Student's *t*-test).
- F, G Distributions of single myofiber areas in innervated (F) and denervated (G) TA muscles in the presence of control or *Myoparr* shRNA. All EmGFP-positive myofibers (innervated control shRNA;  $n = 3,326$ , innervated *Myoparr* shRNA;  $n = 3,035$ , denervated control shRNA;  $n = 3,141$ , denervated *Myoparr* shRNA;  $n = 5,417$ ) were counted. The percentage of myofibers with indicated areas per total fibers were plotted. A Mann-Whitney nonparametric test was used for comparisons between each group (innervated control shRNA *vs.* innervated *Myoparr* shRNA,  $P < 0.001$ ; denervated control shRNA *vs.* denervated *Myoparr* shRNA,  $P < 0.001$ ). Data are shown as mean  $\pm$  SEM.

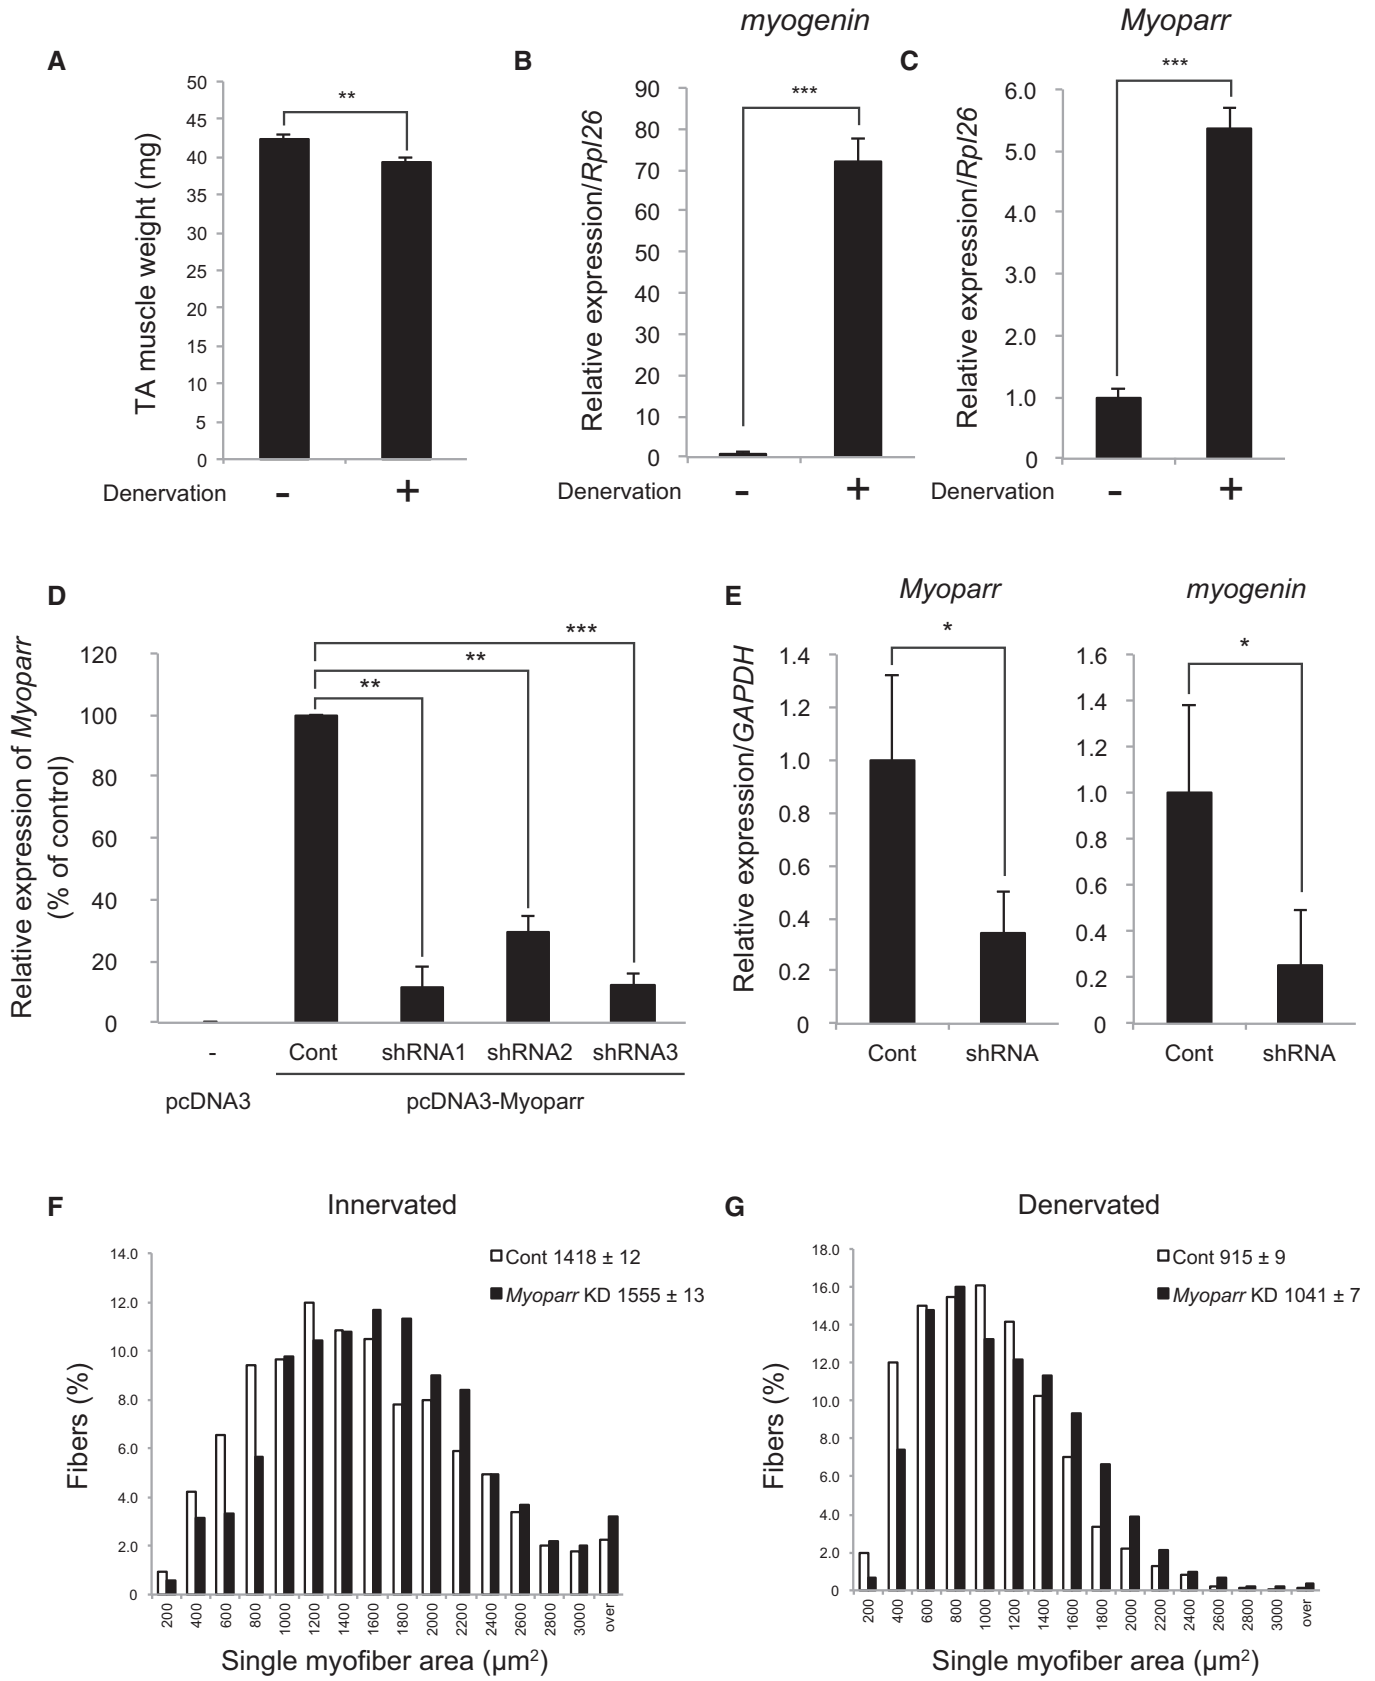

Figure EV4.
